# Supplementary material for: Quantification of combined color and shade changes in colorimetry and image analysis: water pH measurement as an example
Source: Royal Society of Chemistry journal article supplement (doi:10.1039/c8ay00984h), 2018-01-01
Supplement: c8ay00984h1.pdf [file c8ay00984h1.pdf]

## Supplementary Information

### **Quantification of combined color and shade change in colorimetry and image analysis: water pH measurement as an example**

Ying Wang,<sup>a</sup> Yue Liu,<sup>a</sup> Wen Liu,<sup>a</sup> Wenhao Tang,<sup>a</sup> Li Shen,<sup>\*a</sup> Zhilin Li,<sup>ab</sup> and Meikun Fan,<sup>\*a</sup>

<sup>a</sup>*Faculty of Geosciences and Environmental Engineering, Southwest Jiaotong University, Chengdu 611756, China.*

<sup>b</sup>*Department of Land Surveying and Geo-Informatics, Hong Kong Polytechnic University, Hong Kong 99907, China.*

**Corresponding Author:** *Meikun Fan. Faculty of Geosciences and Environmental Engineering, Southwest Jiaotong University, Chengdu 611756, China. Email: [meikunfan@gmail.com](mailto:meikunfan@gmail.com)*

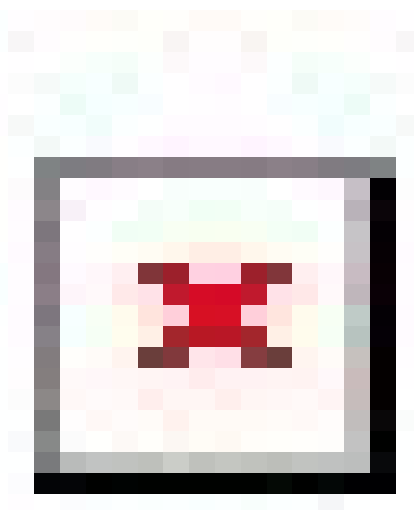

Fig S1 Curve estimation results.

This Fig S1 is the curve estimation results of linear, quadratic and inverse estimation which were discussed using SPSS during modeling, respectively.

**A MATLAB program file named GetAverage.m.**

The file GetAverage.m is used to calculate the mean RGB value of ROIs in MATLAB.

(Note: The program file has been uploaded separately)

**The images of parallel experiments (Corresponds to Fig.2)**

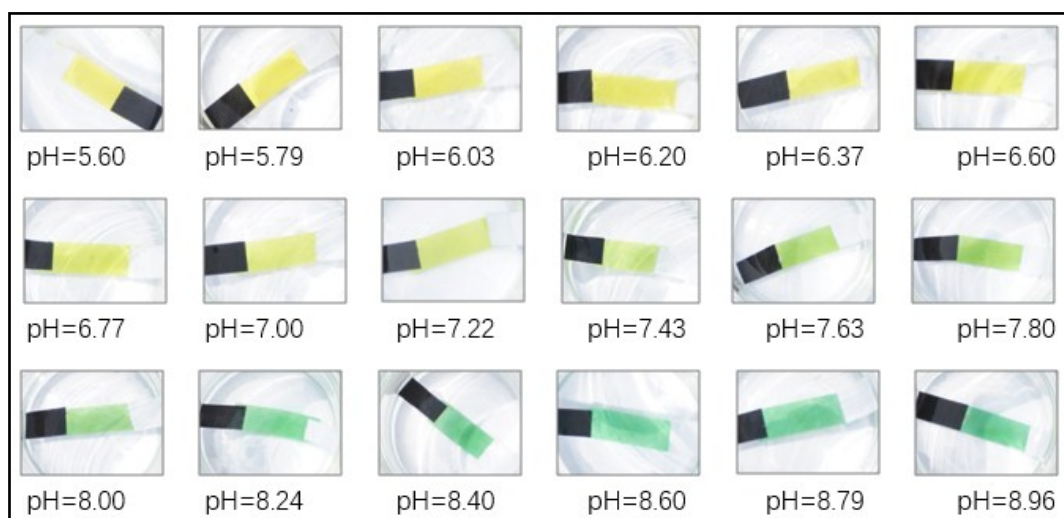

Fig.S2 Images of parallel experiment 1

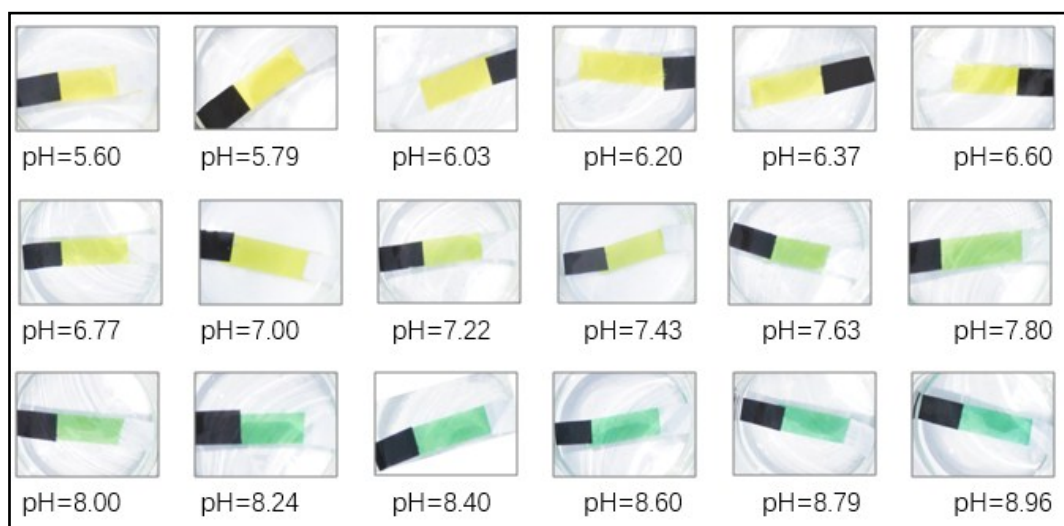

Fig.S3 Images of parallel experiment 2

**The images for the experiments in Table 5.**

The Fig.S4-Fig.S10 represent the original images of experiments under different light sources which corresponds to Table 5, respectively.

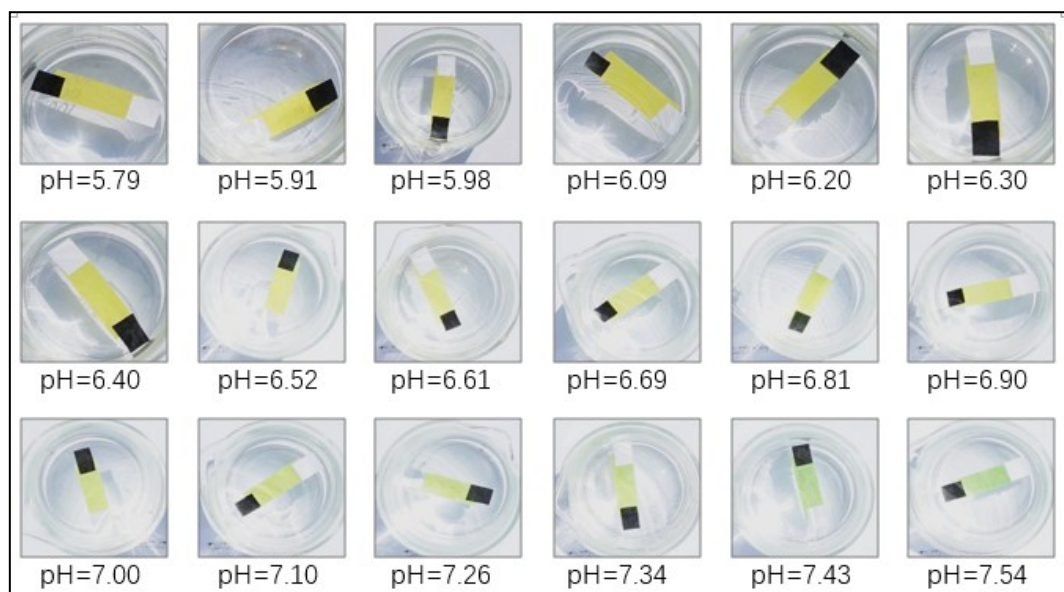

Fig.S4 2016-09-30-Natural light-test 1

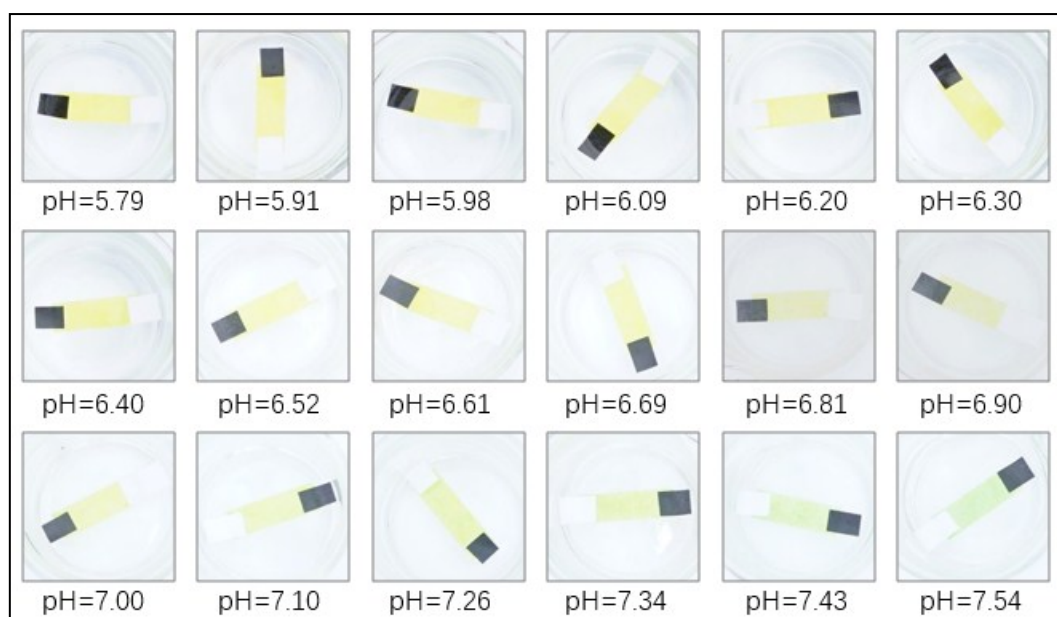

Fig.S5 2016-09-30-Natural light- test 2

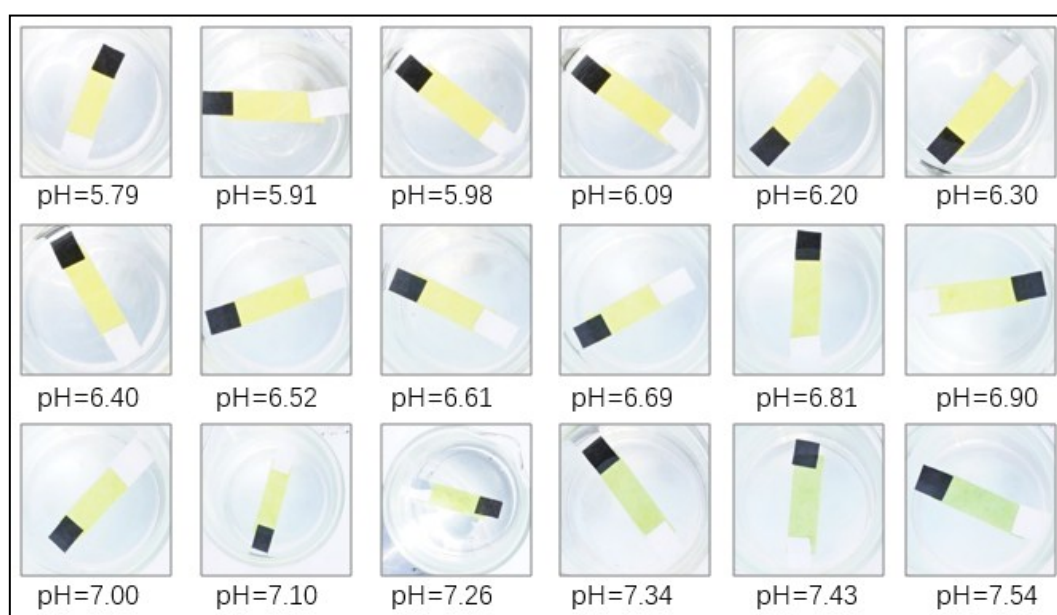

Fig.S6 2016-09-30-Natural light- test 3

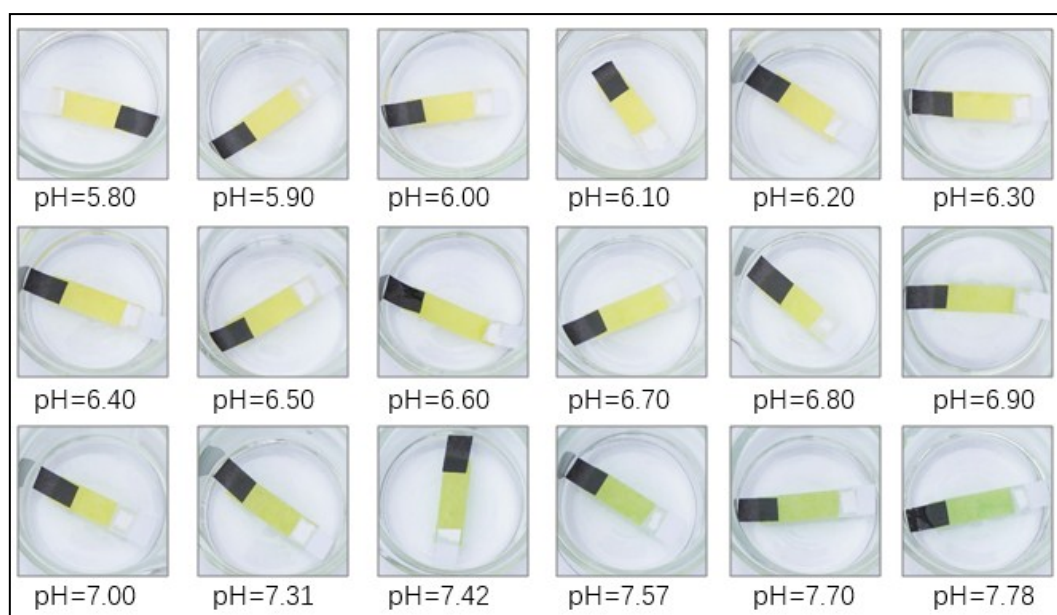

Fig.S7 2016-11-02-Natural light

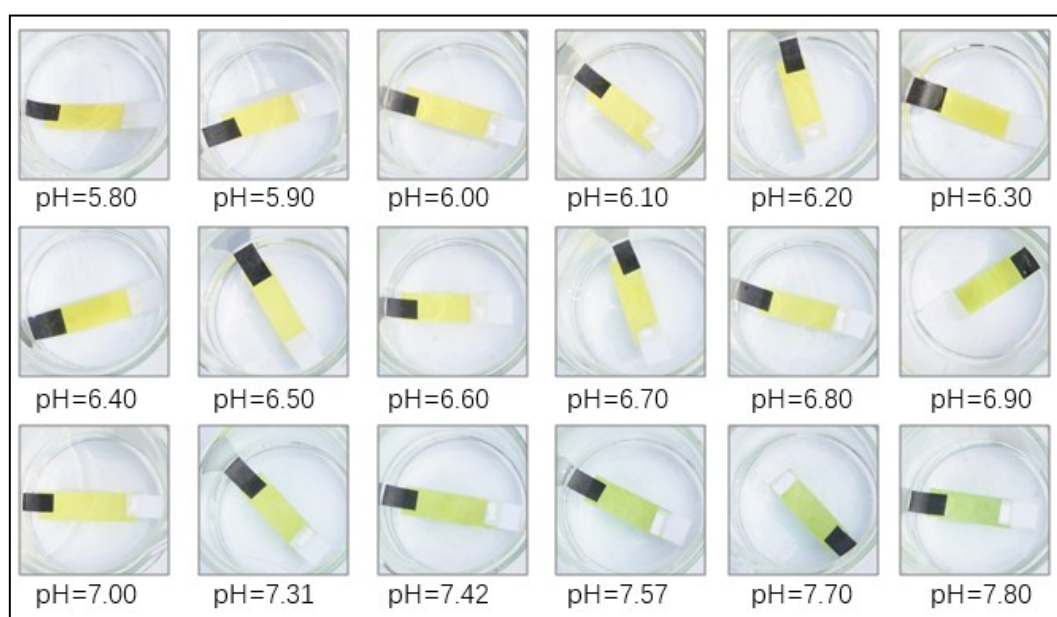

Fig.S8 2016-11-03-Natural light



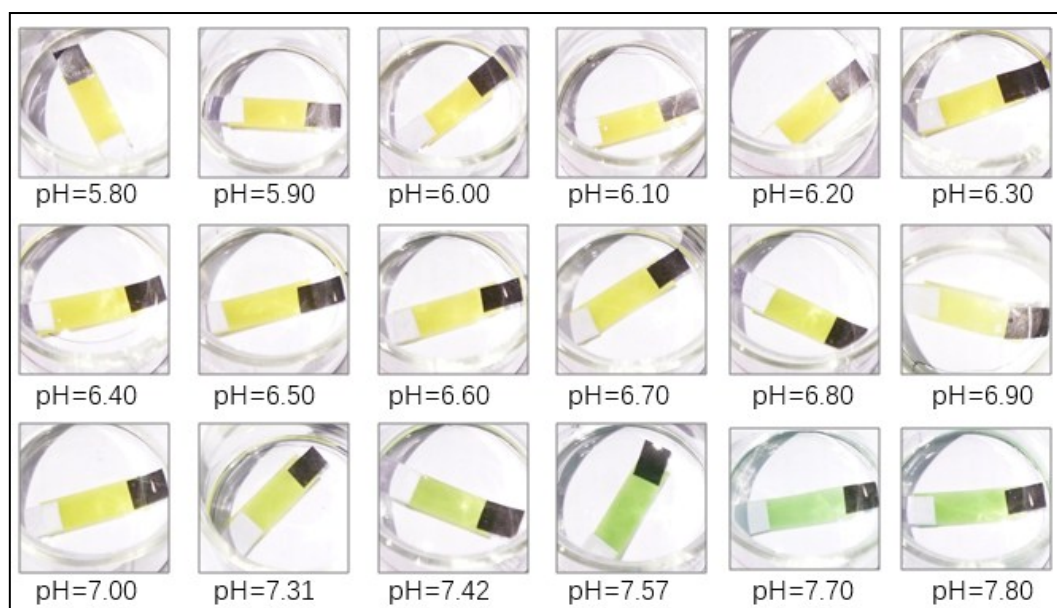

Fig.S9 2016-11-20-Artificial light- test 1

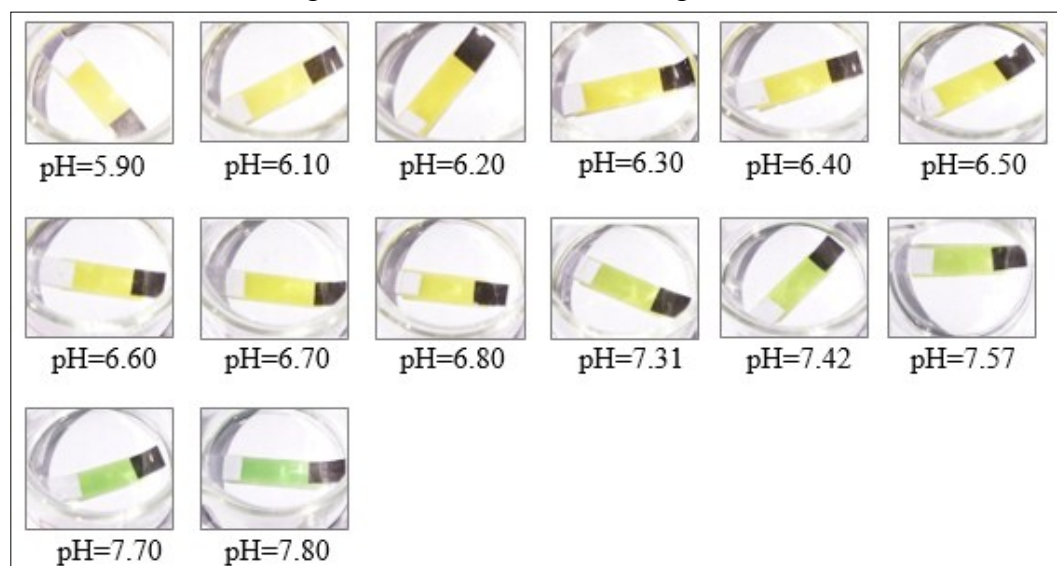

Fig.S10 2016-11-20-Artificial light- test 2

**The images for the experiments in Table 6.**

The brand 1, 2, 3 were commercial bottled water, the lake water-s1 and lake water-s2 were collected from different locations of the lake located in Southwest Jiaotong University Xipu campus.

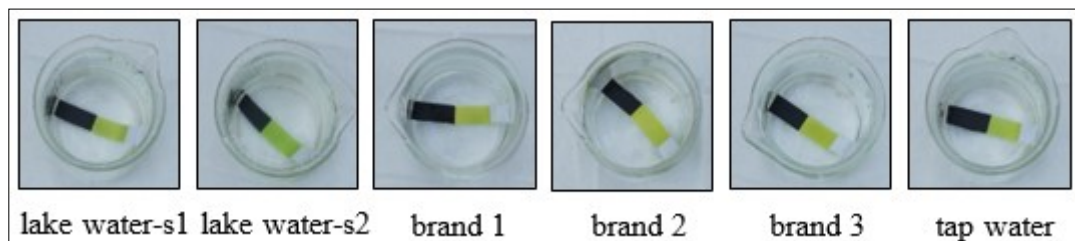

Fig.S11 The images of different water samples
